# Supplementary material for: Hirtinone, a Novel Cycloartane-Type Triterpene and Other Compounds from Trichilia hirta L. (Meliaceae)
Source: Molecules. 2013 Feb 26;18(3):2589–97. doi: 10.3390/molecules18032589 (PMC6270332; doi:10.3390/molecules18032589)

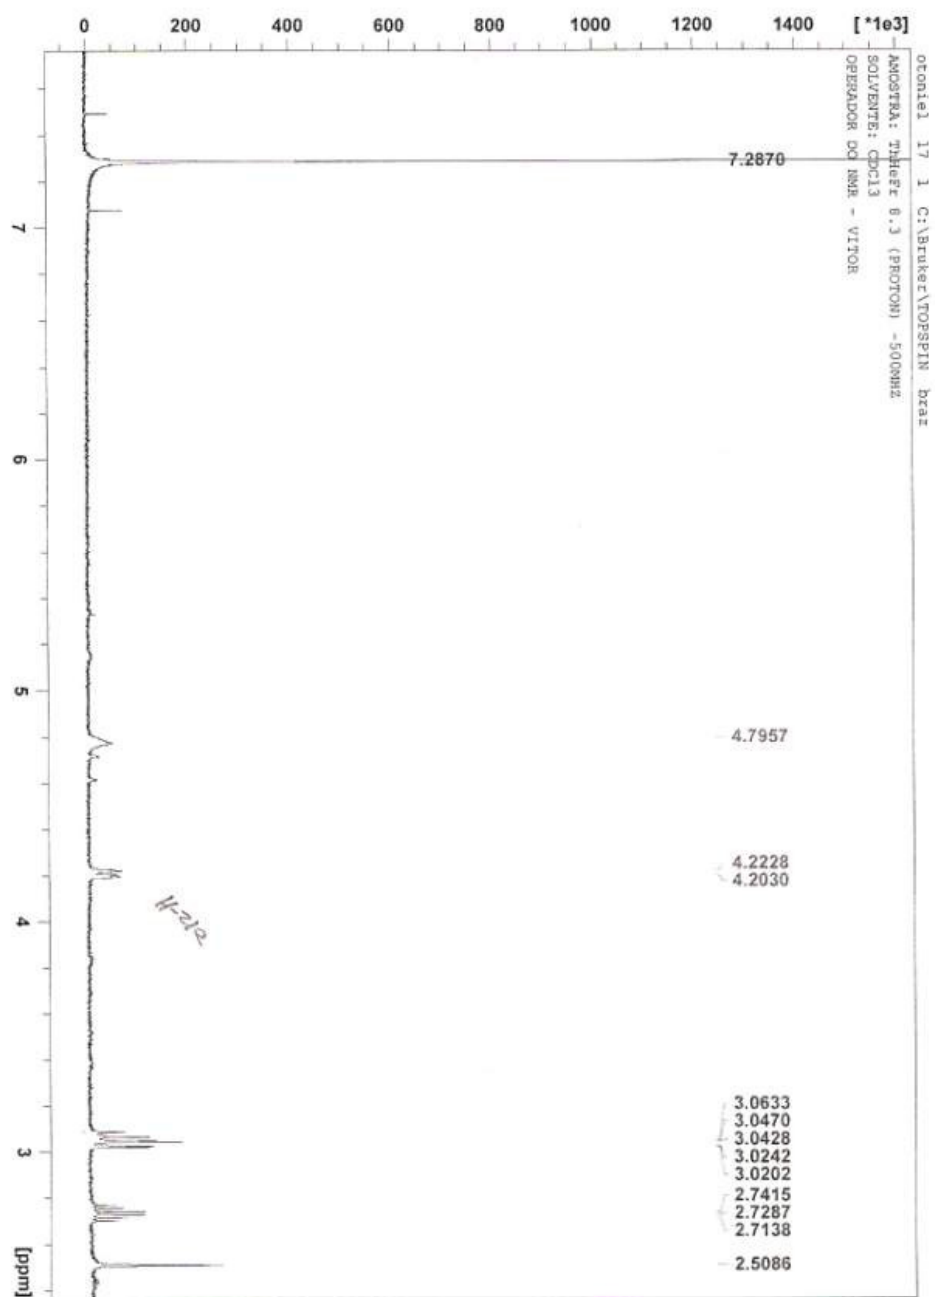

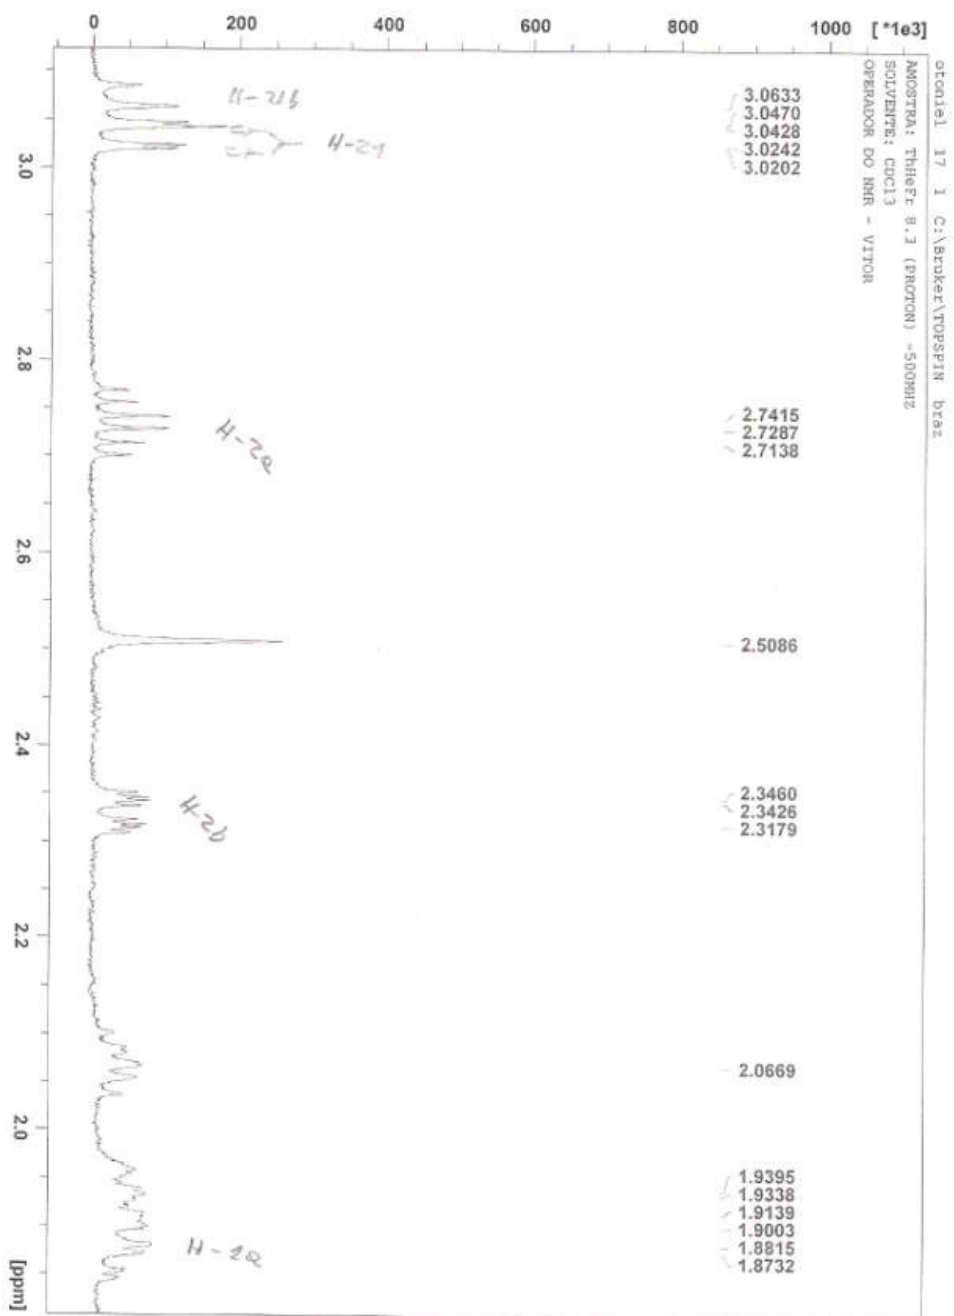

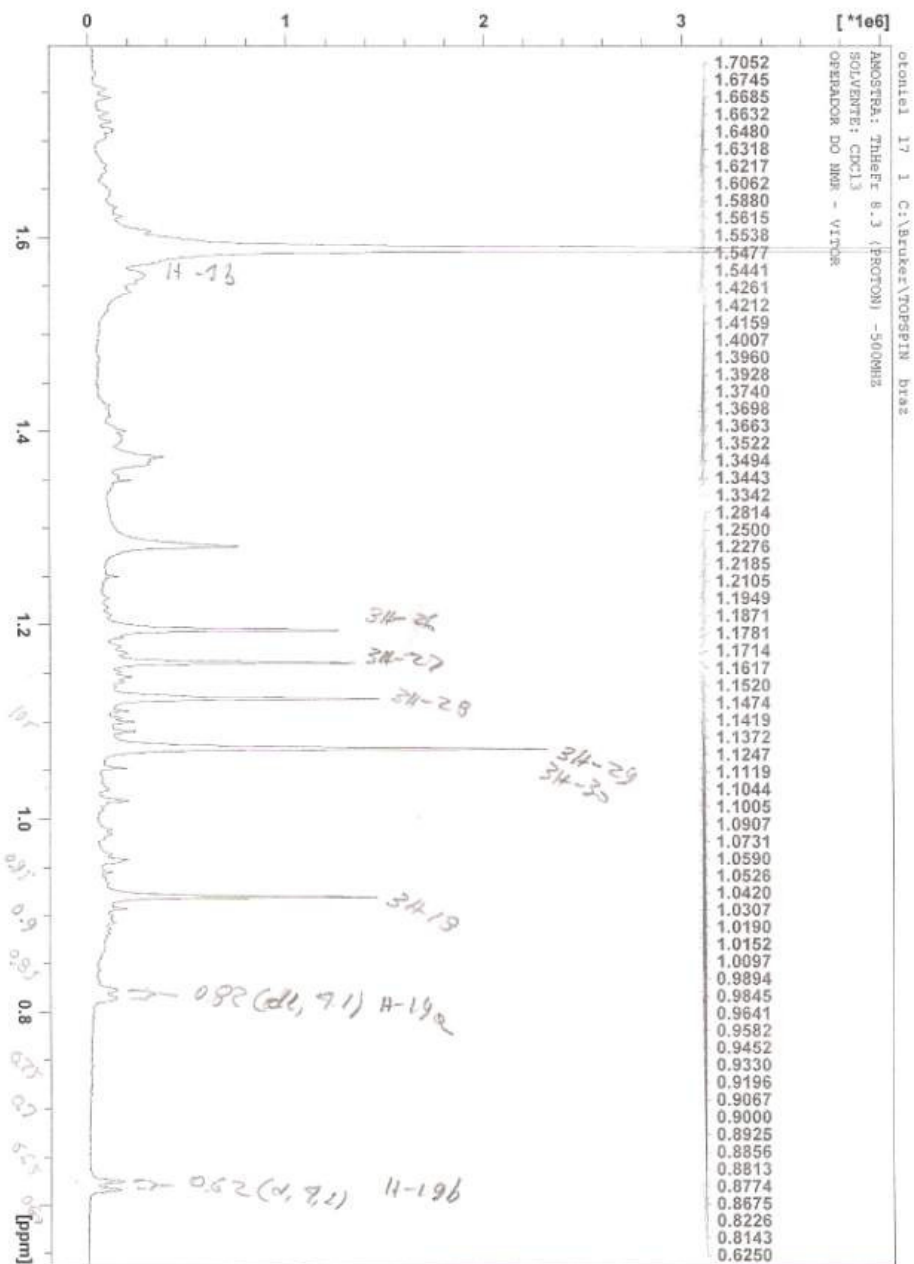

otomel 35 1 C:\Bruker\TOPSPIN brax

ANOSTRA: THERF 8.3 (13C COSYQPSM) - 500MHZ  
SOLVENTE: CDCl3  
OPERADOR: DO MR - VITOR

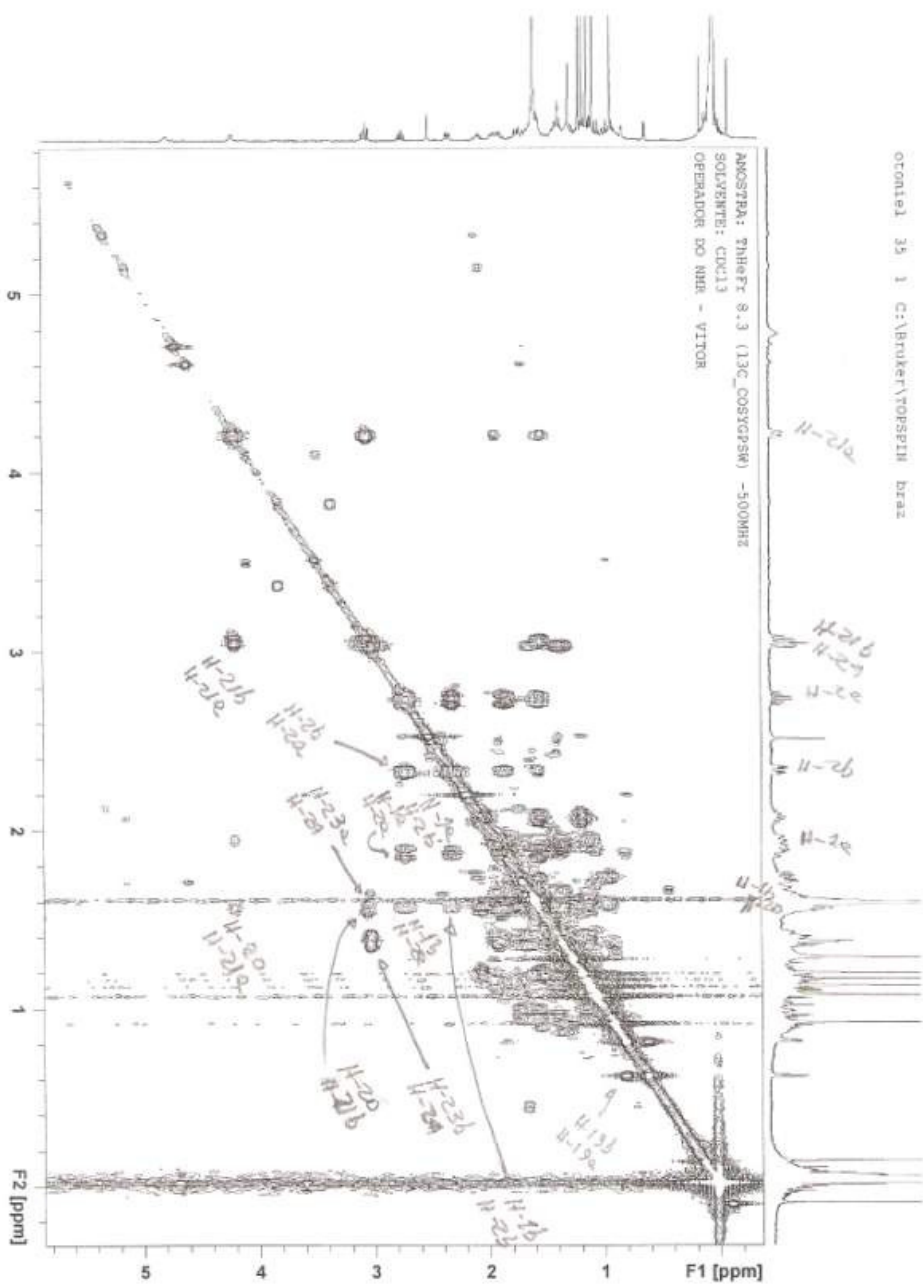

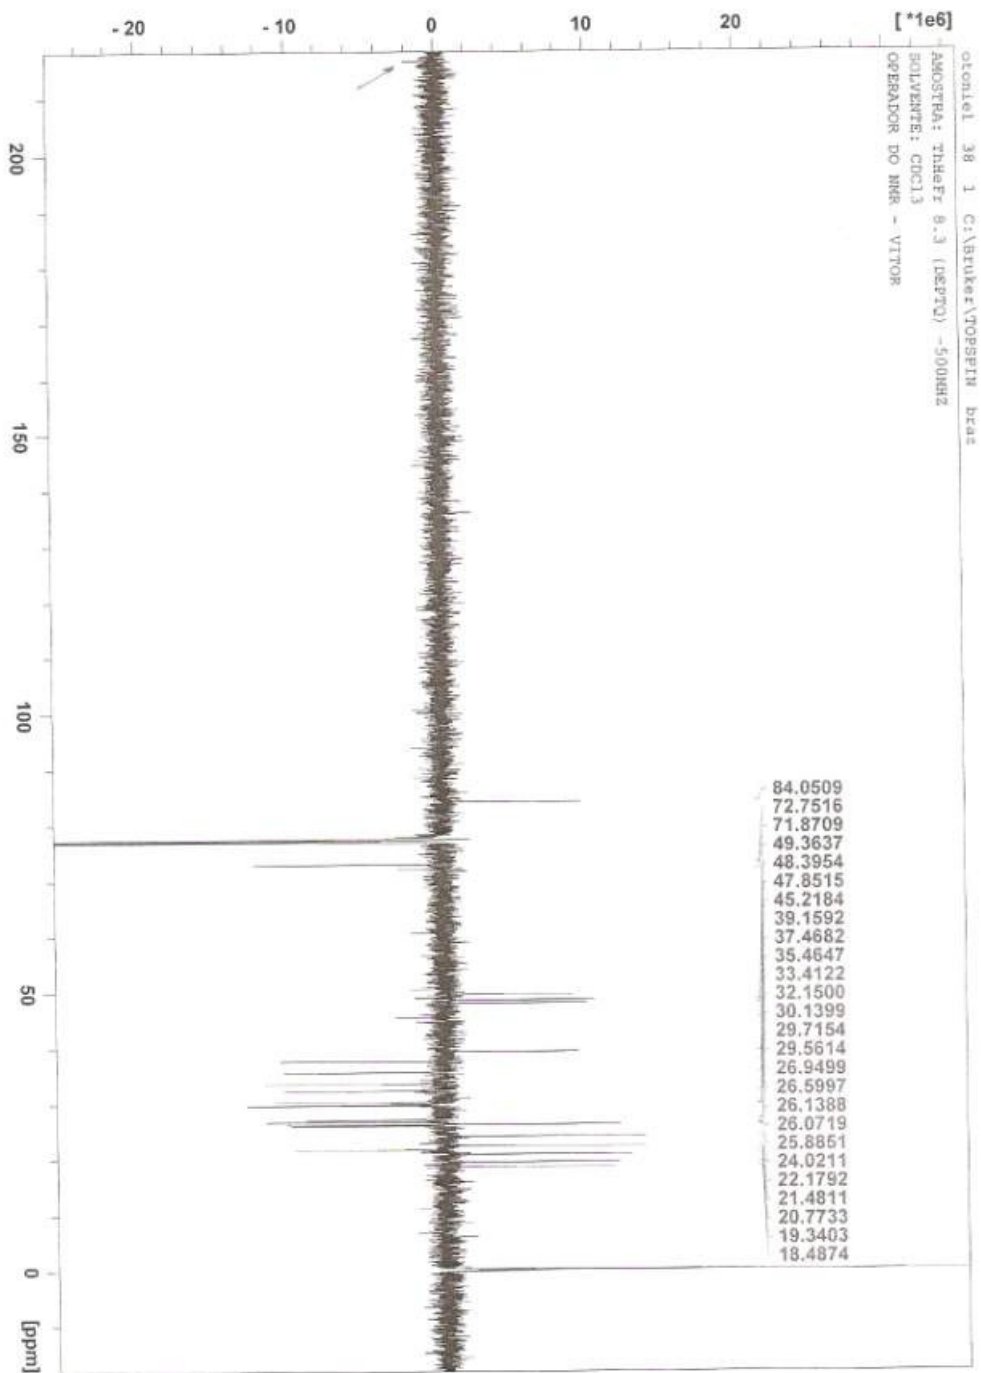

otomiel 36 1 C:\Bruker\TOPSPIN\brax

AMOSTRA: Thiere 0.3 (H2O, ED, AM, SENSIB) -500MHZ  
SOLVENTE: CDCl3  
OPERADOR: DO NRE - VITOR

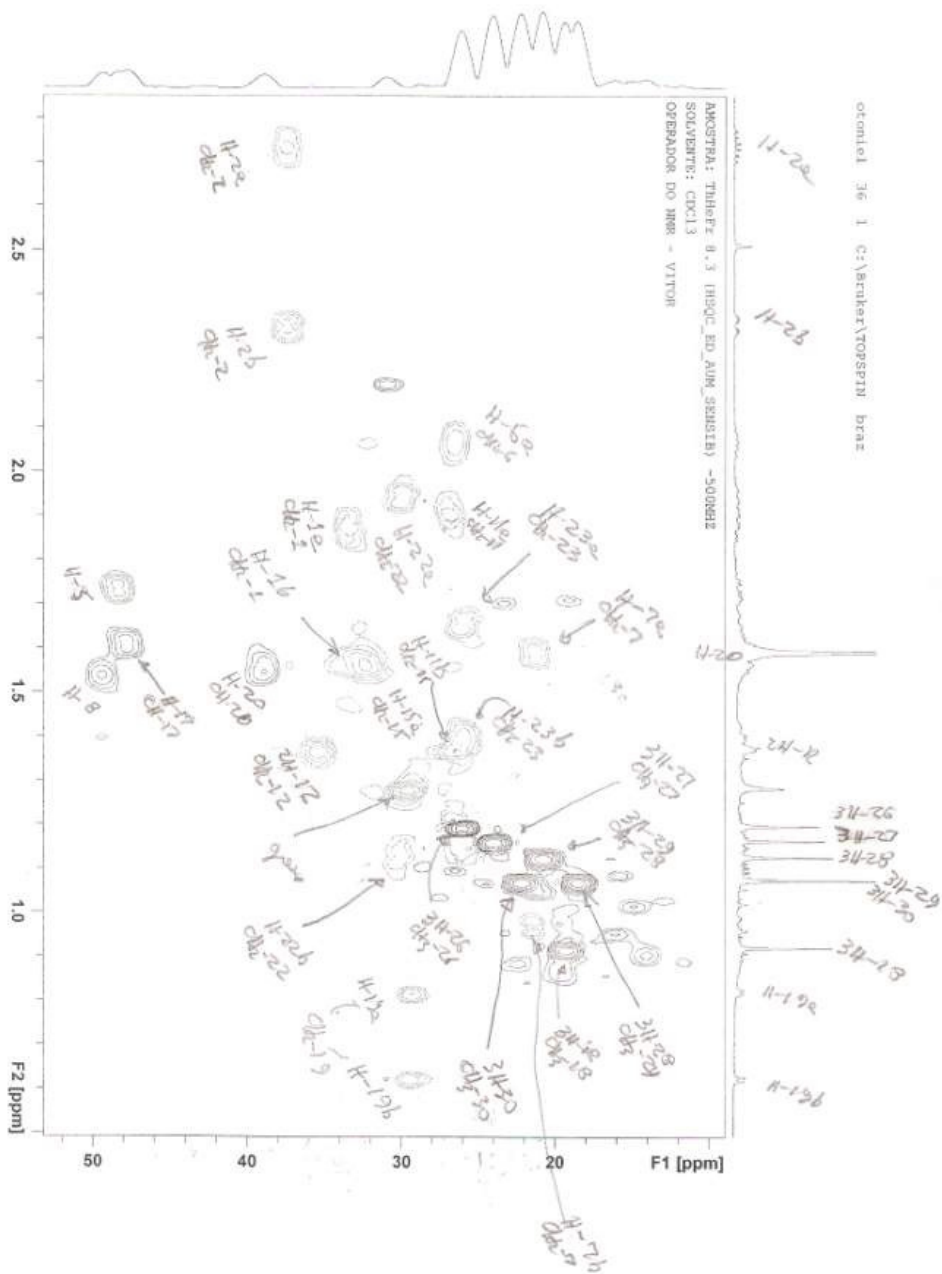

0000147 1 C:\bruker\TOPSPIN data

ANOSTRA: Thiofl 8.3 (IMPACT-HNMR) -500MHZ  
SOLVENTE: CDCl3  
OPERADOR DO NMR - VITOR

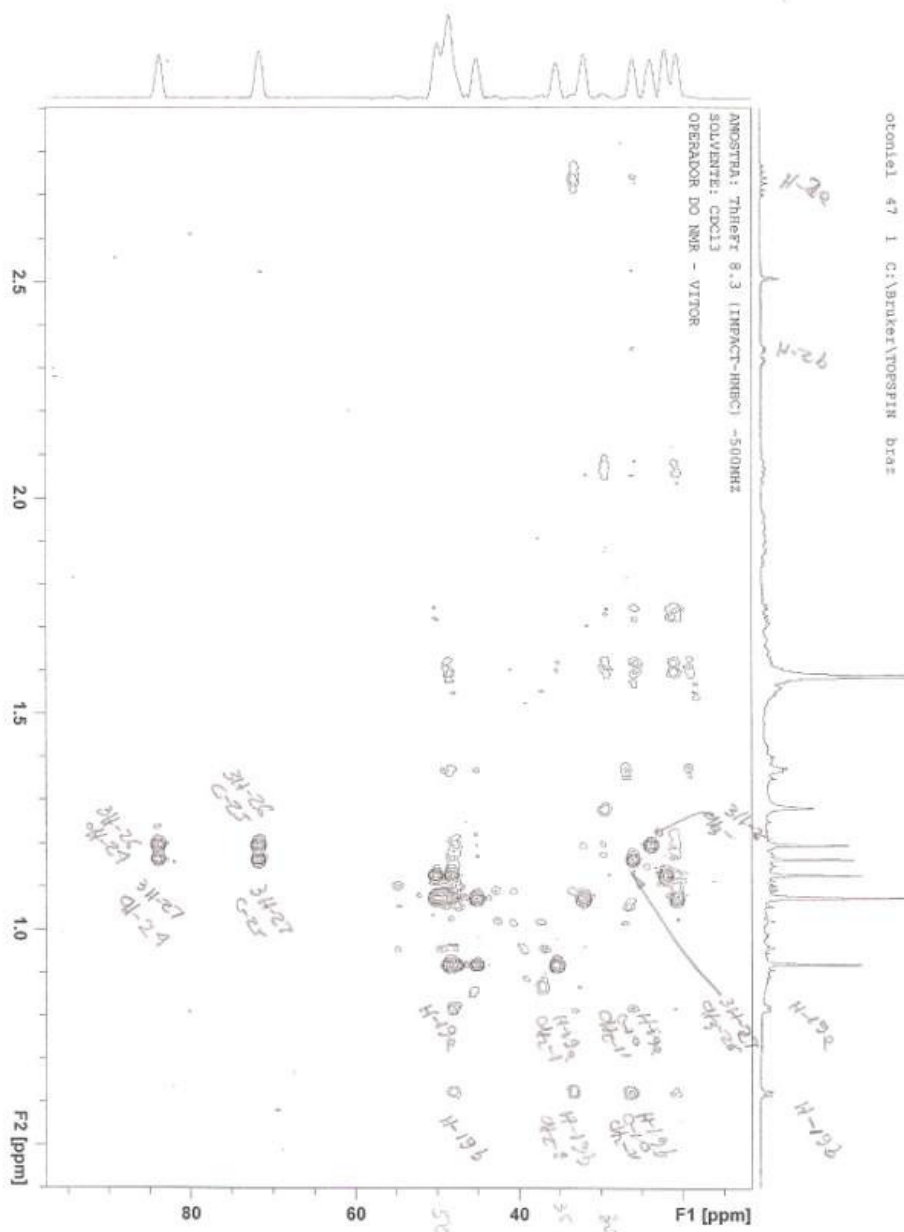

Supplement: Supplementary file 1 [file molecules-18-02589-s001.pdf]
